# Supplementary material for: Selective hydrogenolysis of agricultural straw-based cellulose to propylene glycol and acetol over acidic WOx/ZrO2
Source: Royal Society of Chemistry journal article supplement (doi:10.1039/d3nj00982c), 2023-01-01
Supplement: d3nj00982c1.pdf [file d3nj00982c1.pdf]

**Selective hydrogenolysis of agricultural straw-based  
cellulose to propylene glycol and acetol over acidic  
 $\text{WO}_x/\text{ZrO}_2$**

Zhicheng Luo<sup>[a]</sup>, Zhiguo Zhu<sup>[b]</sup>, Lupeng Han<sup>[c]</sup>, Rui Xiao<sup>[a]\*</sup>, Dawang Chu<sup>[d]\*</sup>

<sup>[a]</sup> Dr. Z. Luo, Dr. R. Xiao

MOE Key Laboratory of Energy Thermal Conversion & Control, School of Energy and Environment, Southeast University, Nanjing 210096 (China)

E-mail address: ruixiao@seu.edu.cn

<sup>[b]</sup> Dr. Z. Zhu

College of Chemistry and Chemical Engineering, Yantai University, Yantai 264005 (China)

<sup>[c]</sup> Dr. L. Han

Department of Chemistry, College of Sciences, Shanghai University, Shanghai 200444 (China)

<sup>[d]</sup> Dr. D. Chu\*

School of Chemistry and Molecular Engineering, East China Normal University, Shanghai 200062 (China)

E-mail address: David\_\_Chu@163.com

## Characterization

X-ray diffraction (XRD) patterns were tested by Rigaku Ultima IV X-ray diffractometer equipped with Cu K $\alpha$  radiation operating at 35 kV and 25 mA ( $\lambda = 1.5405 \text{ \AA}$ ) scanning from  $5^\circ$  to  $90^\circ$  at a speed of  $30^\circ \text{ min}^{-1}$ .

The temperature-programmed reduction (H<sub>2</sub>-TPR) analysis of WO<sub>3</sub>/ZrO<sub>2</sub> catalysts were performed by Micromeritics tp5080 apparatus using a 5% H<sub>2</sub>/He mixture (flowing rate:  $30 \text{ mL}\cdot\text{min}^{-1}$ ) and a heating rate of  $10 \text{ K}\cdot\text{min}^{-1}$  with a thermal conductor detector (TCD).

Nitrogen sorption isotherms were collected on a BELSORP-MAX instrument, and reduced samples were kept on 77 K after degassing for 10 h under vacuum at 573 K. The special surface areas were calculated by the Brunauer-Emmett-Teller (BET) method. Surface density (SD,  $\text{W}/\text{nm}^2$ ) = Concentration of W ( $\text{g}_\text{W}/\text{g}_\text{Cat.}$ )  $\times$  Avogadro number ( $1/(\text{mol W})$ ) / BET area ( $\text{m}^2/\text{g Cat.}$ )  $\times$  Atomic weight of W ( $\text{g}_\text{W}/\text{mol}_\text{W}$ )  $\times 10^{18}$  ( $\text{nm}^2/\text{m}^2$ )

The transmission electron microscopy (TEM) was measured on the FEI Tecnai G2 F30 microscope (operating at 300 kV).

X-ray photoelectron spectroscopy (XPS) were tested by a Thermo Scientific K-Alpha spectrometer equipped with Al K $\alpha$  ( $h\nu = 1486.6 \text{ eV}$ ) radiation.

In CO<sub>2</sub>/NH<sub>3</sub>-TPD measurement, the samples were purged under He flow for 60 min at 723 K. The sample was cooled down to 393 K to be ready for adsorption. After adsorption saturation with purging CO<sub>2</sub>/NH<sub>3</sub>, the samples were heated from 393 K to 1073 K in He flow at a temperature rate of 10 K/min, and the desorbed NH<sub>3</sub> was monitored by a TCD detector.

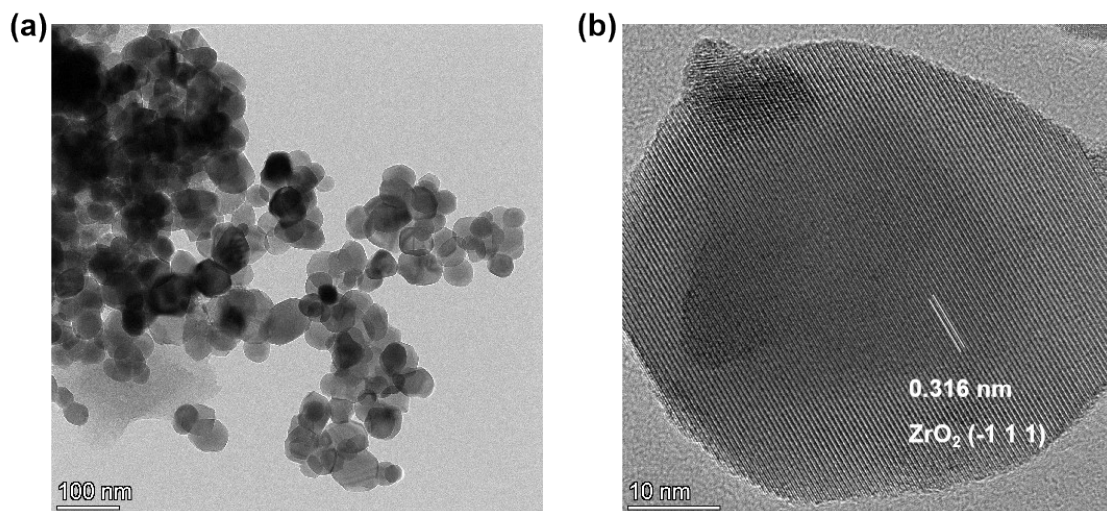

**Figure S1.** TEM image of WO<sub>x</sub>/ZrO<sub>2</sub>(600).

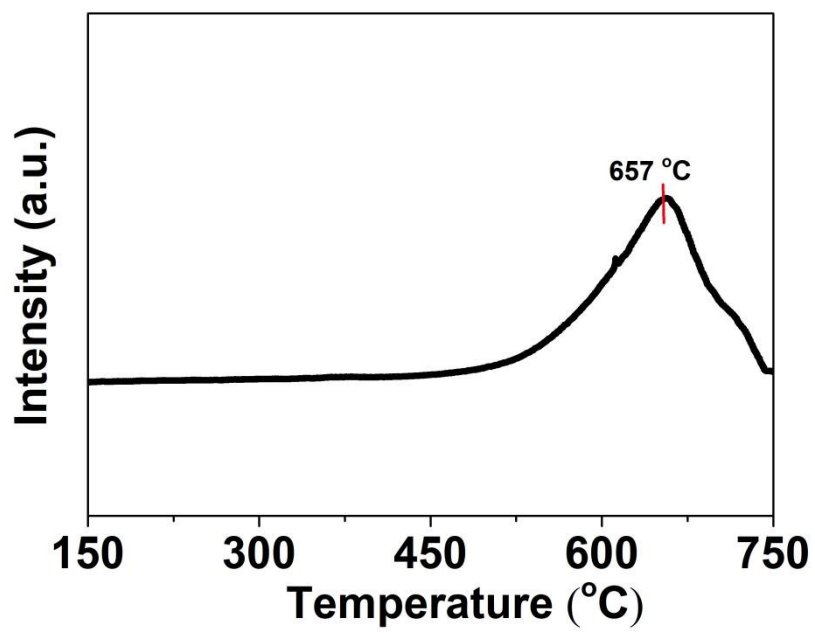

Figure S2. H<sub>2</sub>-TPR profile of the WO<sub>3</sub>/ZrO<sub>2</sub> sample.

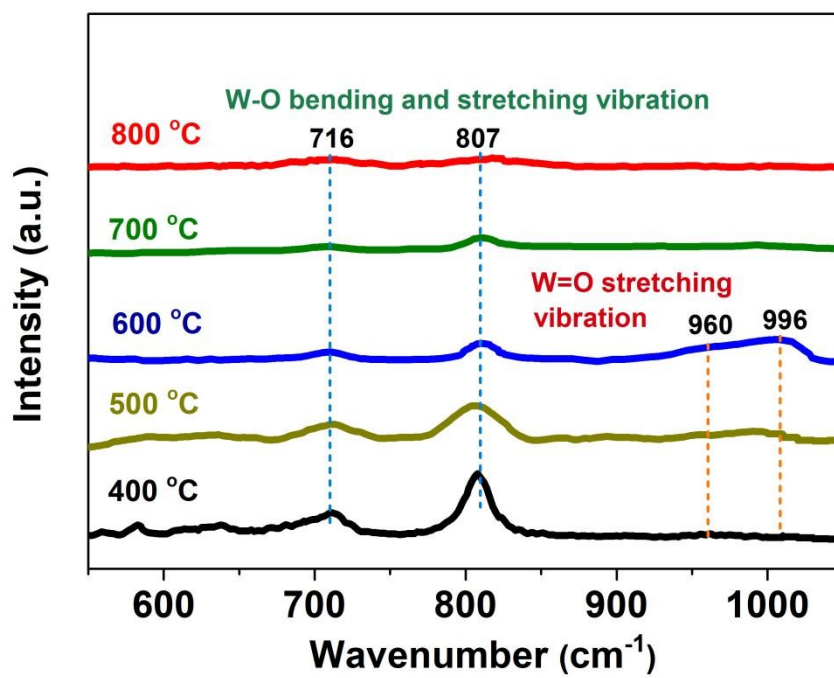

Figure S3. Raman spectra of different WO<sub>x</sub>/ZrO<sub>2</sub>(T) catalysts.

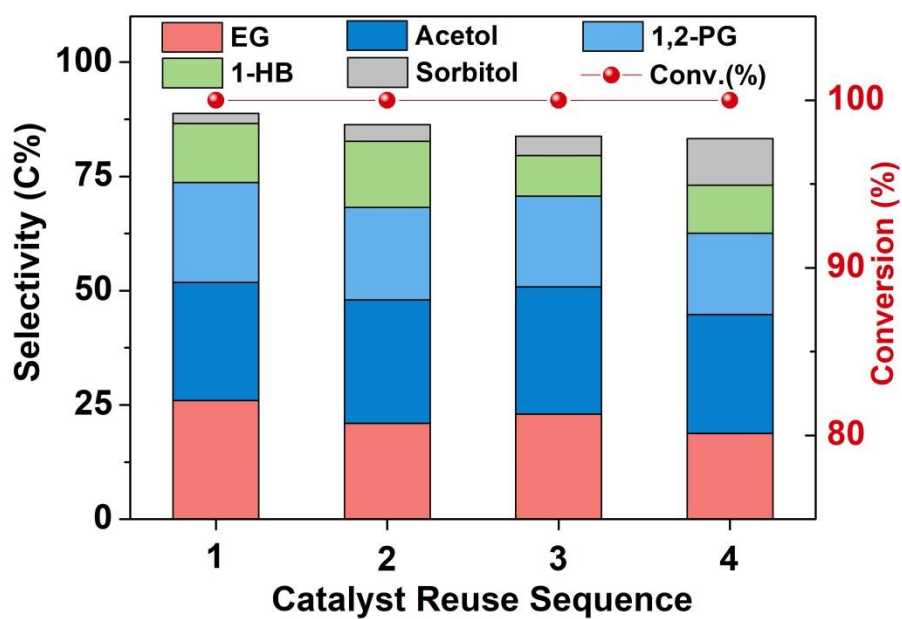

**Figure S4.** Recycling results of the  $\text{WO}_x/\text{ZrO}_2(600)$  catalyst for cellulose hydrogenolysis. Reaction conditions: cellulose, 1.0 g; 20% $\text{WO}_x/\text{ZrO}_2(600)$ , 0.2 g; 1%Ru/AC catalyst, 0.2 g;  $\text{H}_2\text{O}$ , 100 mL;  $\text{H}_2$ , 4 MPa; 800 rpm; 240 °C; 2 h.

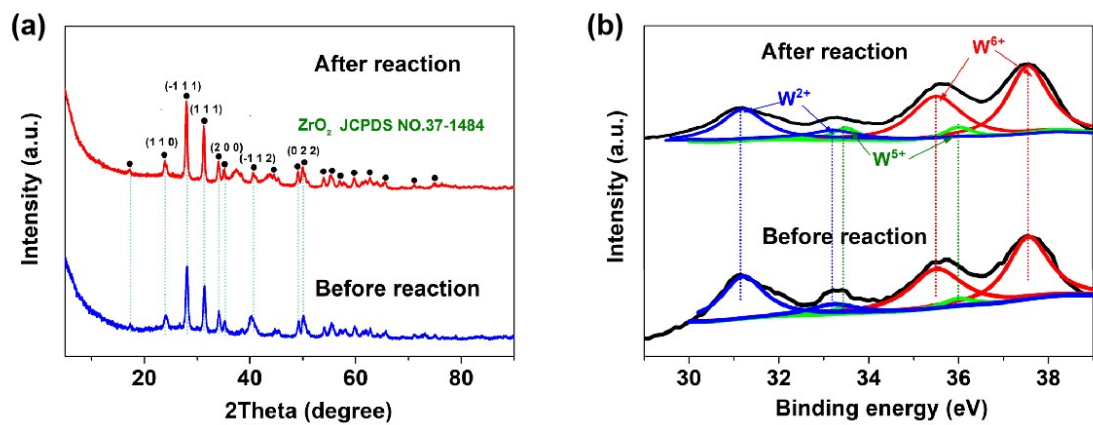

**Figure S5.** (a) xrd (b) xps spectra of WO<sub>x</sub>/ZrO<sub>2</sub>(600) catalyst before and after reaction.

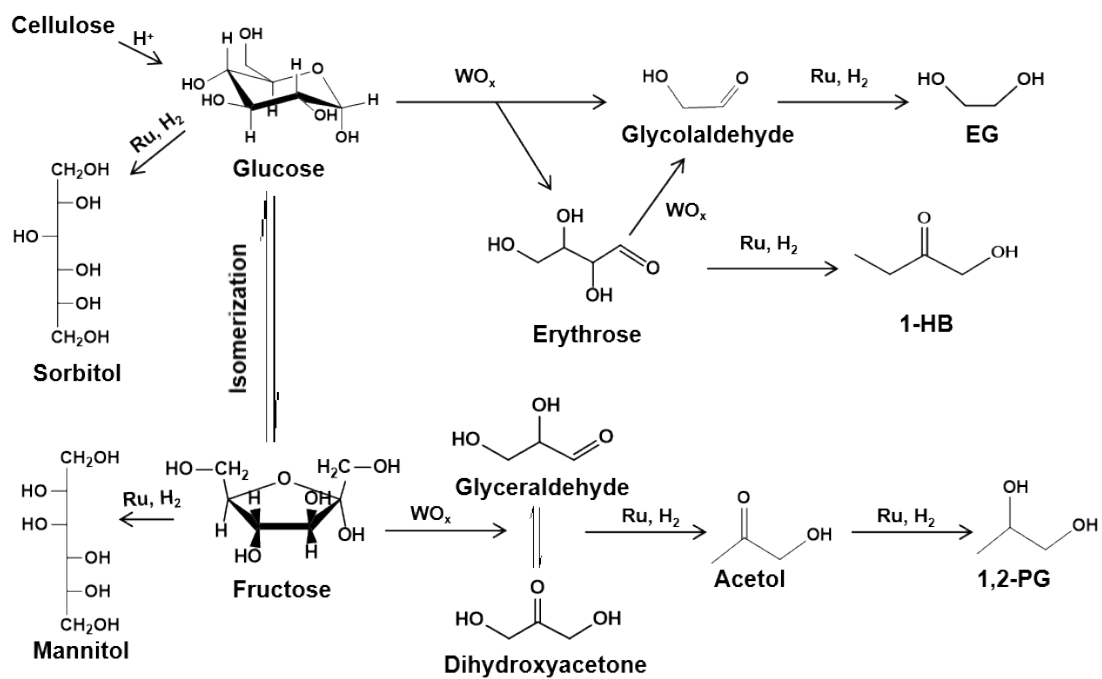

**Figure S6.** The mechanism of cellulose hydrogenolysis to acetol and 1,2-PG.



**Table S1.** The evaluation of different catalysts for the retro-aldol condensation of cellulose.

| Catalyst                                          | Conv.<br>(C %) | Selectivity (C %) |        |        |      |          |       | Carbon balance<br>(%) |
|---------------------------------------------------|----------------|-------------------|--------|--------|------|----------|-------|-----------------------|
|                                                   |                | EG                | Acetol | 1,2-PG | 1-HB | Sorbitol | Other |                       |
| WO <sub>x</sub> /ZrO <sub>2</sub> (400)+<br>Ru/AC | 97.1           | 47.4              | 7.5    | 7.7    | 4.1  | 12.8     | 8.2   | 85.7                  |
| WO <sub>x</sub> /ZrO <sub>2</sub> (500)+<br>Ru/AC | 98.5           | 45.1              | 10.1   | 14.2   | 8.5  | 5.6      | 2.2   | 85.7                  |
| WO <sub>x</sub> /ZrO <sub>2</sub> (600)+<br>Ru/AC | 100.0          | 26.0              | 25.8   | 21.9   | 12.9 | 2.2      | 6.2   | 89.9                  |
| WO <sub>x</sub> /ZrO <sub>2</sub> (700)+<br>Ru/AC | 100.0          | 48.8              | 8.0    | 12.8   | 6.5  | 3.2      | 2.0   | 82.3                  |
| WO <sub>x</sub> /ZrO <sub>2</sub> (800)+<br>Ru/AC | 100.0          | 58.7              | 3.0    | 15.1   | 1.2  | 2.3      | 0.8   | 82.1                  |

Reaction conditions: cellulose, 1.0 g; 30%WO<sub>x</sub>/ZrO<sub>2</sub>(T), 0.2 g; 1%Ru/AC catalyst, 0.2 g; H<sub>2</sub>O, 100 mL; H<sub>2</sub>, 4 MPa; 800 rpm; 240 °C; 2 h.

**Table S2.** The evaluation of different catalysts for the retro-aldol condensation of cellulose.

| Catalyst                                               | Conv. (C %) | Selectivity (C %) |        |        |      |          |        | Carbon balance (%) |
|--------------------------------------------------------|-------------|-------------------|--------|--------|------|----------|--------|--------------------|
|                                                        |             | EG                | Acetol | 1,2-PG | 1-HB | Sorbitol | Others |                    |
| WO <sub>x</sub> /ZrO <sub>2</sub> (600)                | 88.1        | 1.2               | 0      | 2.1    | 0    | 9.1      | 8.3    | 20.7               |
| WO <sub>x</sub> /ZrO <sub>2</sub> (600)<br>+ 0.5%Ru/AC | 99.0        | 16.5              | 19.3   | 8.2    | 4.9  | 3.5      | 8.1    | 60.5               |
| WO <sub>x</sub> /ZrO <sub>2</sub> (600)<br>+ 1.0%Ru/AC | 100.0       | 26.0              | 25.8   | 21.9   | 12.9 | 2.2      | 6.2    | 89.9               |
| WO <sub>x</sub> /ZrO <sub>2</sub> (600)<br>+ 1.5%Ru/AC | 100.0       | 19.3              | 13.4   | 16.7   | 9.3  | 4.1      | 10.3   | 73.1               |
| 1%Ru/AC                                                | 55.2        | 15.2              | 0.1    | 4.3    | 0.5  | 28.3     | 2.2    | 50.6               |

Reaction conditions: cellulose, 1.0 g; 30%WO<sub>x</sub>/ZrO<sub>2</sub>(600), 0.2 g; 1%Ru/AC catalyst, 0.2 g; H<sub>2</sub>O, 100 mL; H<sub>2</sub>, 4 MPa; 800 rpm; 240 °C; 2 h.

**Table S3.** ICP analysis of metal content of 30%WO<sub>x</sub>/ZrO<sub>2</sub>(600) + 1%Ru/AC catalyst before and after reaction.

---

| Catalyst     | Ru loading (wt %) | W loading (wt %) |
|--------------|-------------------|------------------|
| Fresh        | 1.0               | 30.3             |
| After 4 runs | 1.0               | 26.9             |

---

Reaction conditions: cellulose, 1.0 g; 30%WO<sub>x</sub>/ZrO<sub>2</sub>(600), 0.2 g; 1%Ru/AC catalyst, 0.2 g; H<sub>2</sub>O, 100 mL; H<sub>2</sub>, 4 MPa; 800 rpm; 240 °C; 2 h.

---

**Table S4.** Catalytic conversion of glucose catalyzed by WO<sub>x</sub>/ZrO<sub>2</sub>(T) catalysts.

| Catalyst                                      | Conv. (C %) | Selectivity (C %) |        |
|-----------------------------------------------|-------------|-------------------|--------|
|                                               |             | Fructose          | Others |
| WO <sub>x</sub> /ZrO <sub>2</sub> (400)+Ru/AC | 24.3        | 66.1              | 9.9    |
| WO <sub>x</sub> /ZrO <sub>2</sub> (500)+Ru/AC | 24.7        | 64.5              | 10.9   |
| WO <sub>x</sub> /ZrO <sub>2</sub> (600)+Ru/AC | 26.8        | 75.5              | 13.1   |
| WO <sub>x</sub> /ZrO <sub>2</sub> (700)+Ru/AC | 18.1        | 73.8              | 6.1    |
| WO <sub>x</sub> /ZrO <sub>2</sub> (800)+Ru/AC | 14.6        | 55.9              | 11.8   |

Reaction conditions: 1 g glucose, 0.2 g catalyst, 50 ML DI-water, 120 °C, 2 h.

---
